# Supplementary figures and images for: Oxygen sensing materials based on mesoporous silica MCM-41 and Pt(ii)–porphyrin complexes
Source: Royal Society of Chemistry journal article supplement (doi:10.1039/b503336e), 2005-01-01

### Electronic Supplementary Information (ESI)

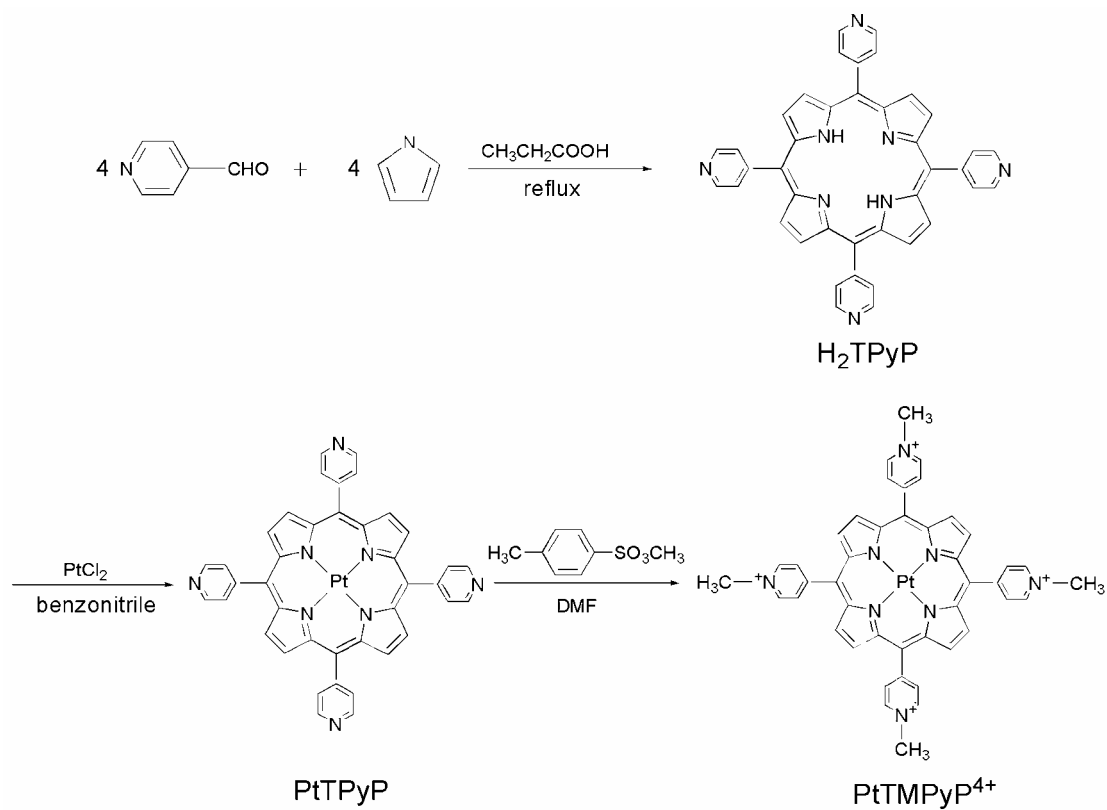

The synthesis scheme of Pt(II)-porphyrins

Supplement: b503336e.pdf [file b503336e.pdf]
